# Supplementary material for: Steller Sea Lion (Eumetopias jubatus) Response to Non-lethal Hazing at Bonneville Dam
Source: Frontiers journal article supplement (doi:10.3389/fcosc.2021.760866), 2021-11-29
Supplement: Data_Sheet_1.docx [file Data_Sheet_1.docx]

**Supplemental Material . Full model with predictors that were evaluated during model selection.**

| **Dependent variable (response)** | **Model** | **Factors (predictors)** | **AIC** |
| --- | --- | --- | --- |
|  |  |  |  |
| Number of individuals | Poisson distribution with log-link function | **Hazing, Year, Date, hazing*zone** | **16300.11** |
| Hazing, Year, Date | 16301.77 |
| Hazing, Year | 16304.87 |
| Hazing | 16398.85 |
|  |  |  |  |
| Foraging vs transiting | Binomial | **Treatment, # SSL present, year, treatment*level** | **2621.851** |
| Treatment, # SSL present, year, level | 2675.796 |
| Treatment, # SSL present, year | 2630.296 |
| Treatment, # SSL present, Hazing number | 2646.377 |
|  |  |  |  |
| Vigilance | Multinomial logistic regression | Number of individuals present , Treatment, Hazing number, Year, Treatment*hazing number | N/A |
