# Supplementary material for: Steller Sea Lion (Eumetopias jubatus) Response to Non-lethal Hazing at Bonneville Dam
Source: Frontiers journal article supplement (doi:10.3389/fcosc.2021.760866), 2021-11-29
Supplement: Table_1.docx [file Table_1.docx]

**Supplementary Table 1. Behavioral observations and treatments of non-lethal hazing applied to SSL at Bonneville Dam (BON) in 2018 and 2020.**

|  | **March 2018** | | | | **March 2020** | |
| --- | --- | --- | --- | --- | --- | --- |
| Treatment | Baseline | Hazing | | Hazing Cessation | Hazing | Hazing  Cessation |
| Calendar Day | 1,2 | 5,6, | 12,13,14,15 | 7,8 | - | - |
| *n* observations | 143 | 134 | 116 | 173 | - | - |
|  | **April 2018** | | | | **April 2020** | |
| Treatment | Baseline | Hazing | | Hazing Cessation | Hazing | Hazing  Cessation |
| Calendar Day | - | 9,10 | 13,16 | 11,12 | 14,17 | 15 |
| *n* observations | - | 543 | 607 | 350 | 363 | 362 |
|  | **May 2018** | | | | **May 2020** | |
| Treatment | Baseline | Hazing | | Hazing Cessation | Hazing | Hazing  Cessation |
| Calendar Day | - | 21,22,23,24,25 | | - | 18,20 | 19 |
| *n* observations | - | 303 | | - | 42 | 153 |
